# Supplementary material for: Effect of radiation therapy on cerebral cortical thickness in glioma patients: Treatment-induced thinning of the healthy cortex
Source: PubMed Central journal article supplement (PMC7284116; doi:10.1093/noajnl/vdaa060), 2020-05-21
Supplement: vdaa060_suppl_supplementary_figure_2.pdf [file vdaa060_suppl_supplementary_figure_2.pdf]

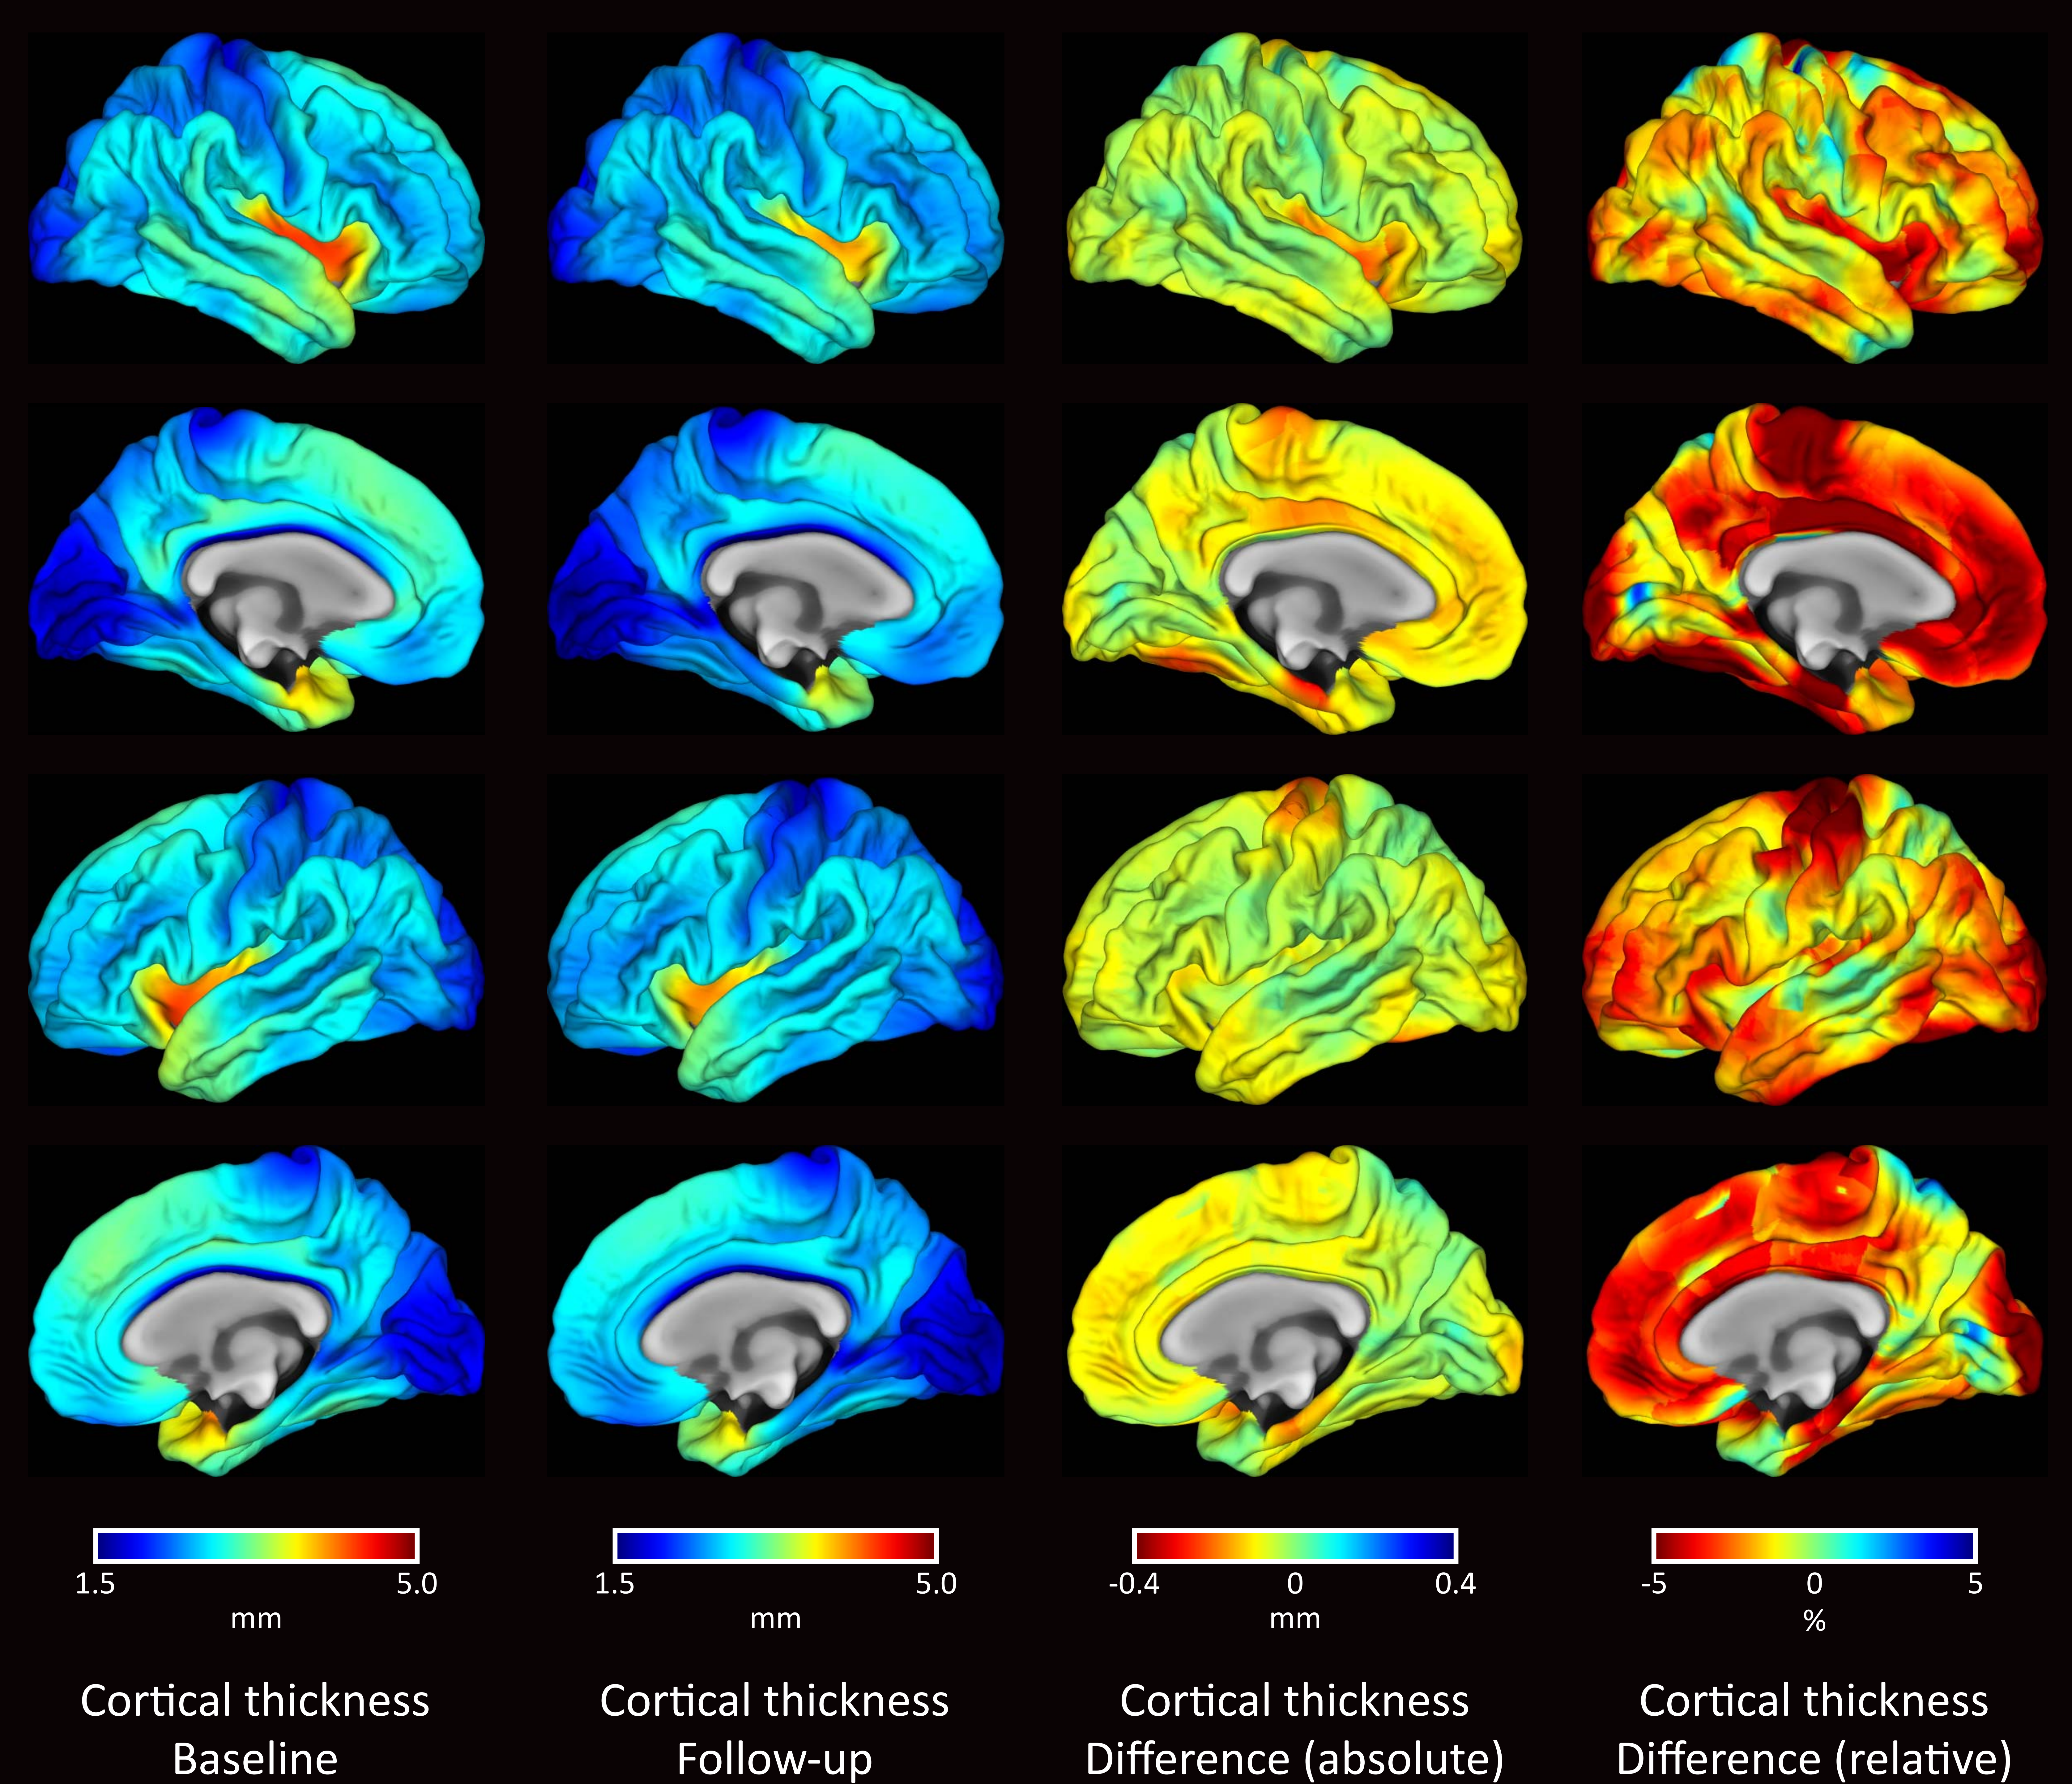

**Supplementary figure 2** Mean local cortical thickness at baseline and follow-up, and mean absolute and relative differences in cortical thickness
