# Supplementary material for: Effect of radiation therapy on cerebral cortical thickness in glioma patients: Treatment-induced thinning of the healthy cortex
Source: PubMed Central journal article supplement (PMC7284116; doi:10.1093/noajnl/vdaa060), 2020-05-21
Supplement: vdaa060_suppl_supplementary_figure_3.pdf [file vdaa060_suppl_supplementary_figure_3.pdf]

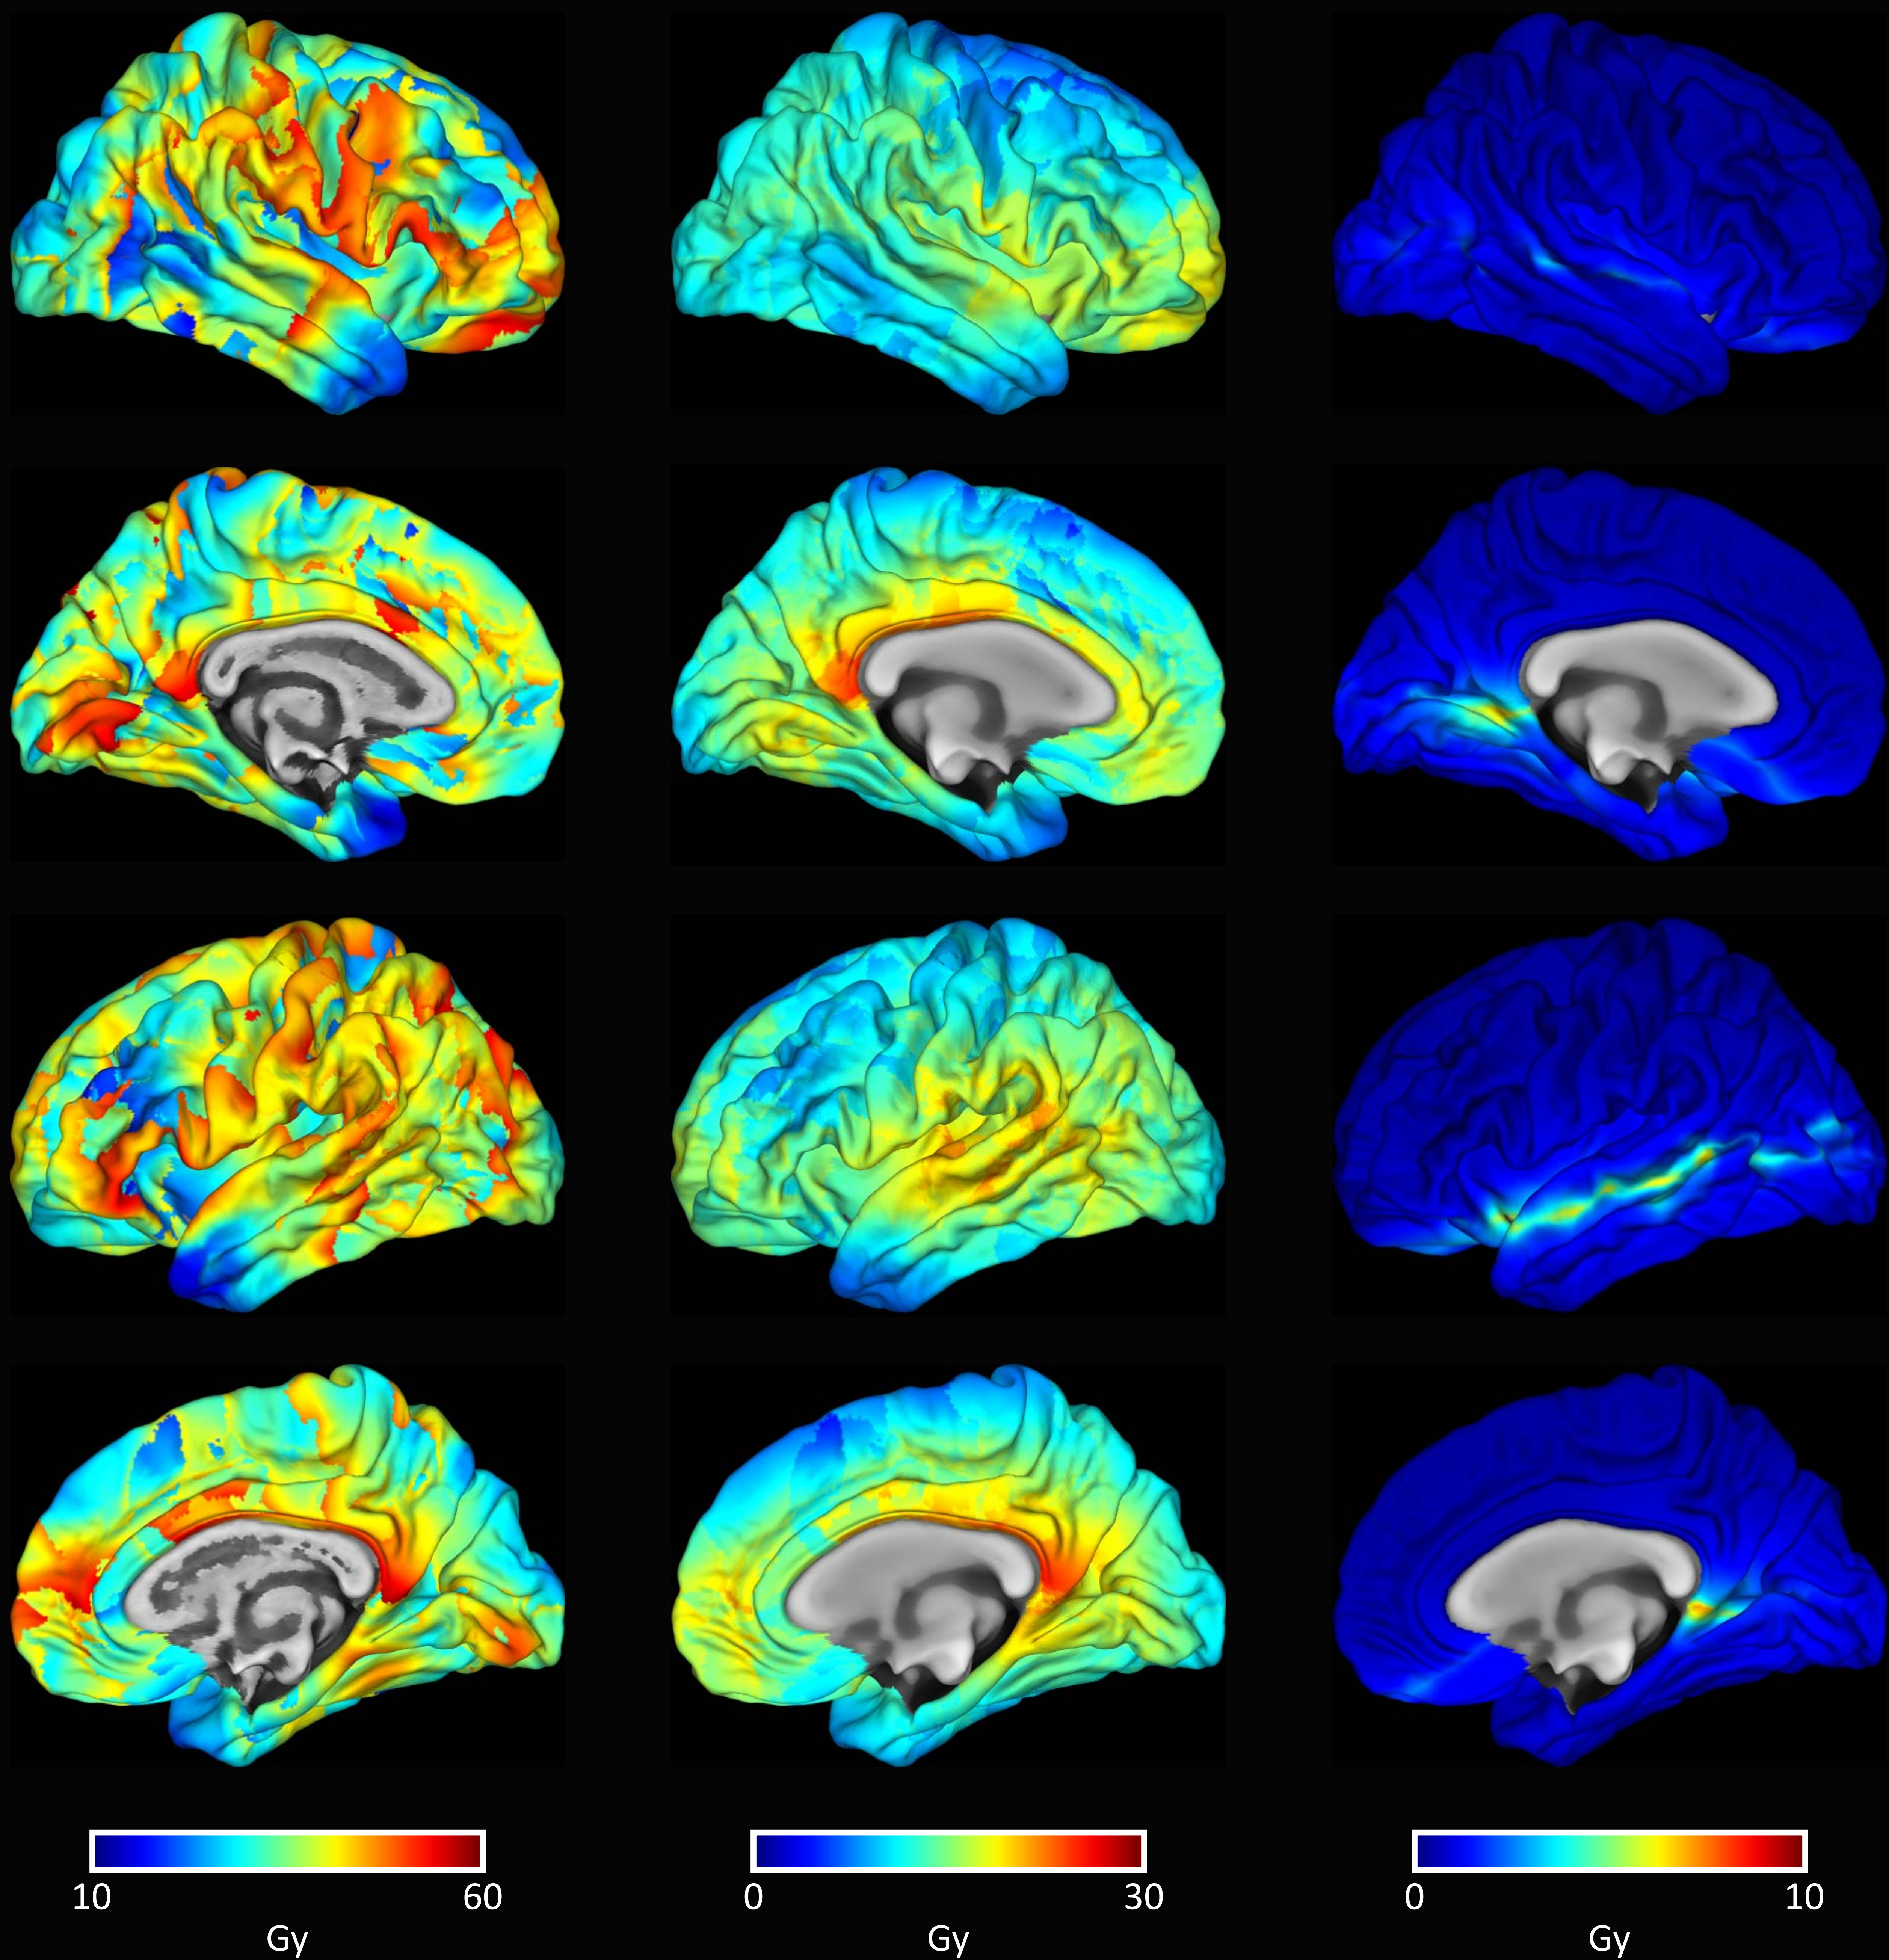

Maximum dose

Mean dose

Minimum dose

**Supplementary figure 3** Local maximum, mean and minimum dose, after PTV censoring
