# Supplementary material for: Effect of radiation therapy on cerebral cortical thickness in glioma patients: Treatment-induced thinning of the healthy cortex
Source: PubMed Central journal article supplement (PMC7284116; doi:10.1093/noajnl/vdaa060), 2020-05-21
Supplement: vdaa060_suppl_supplementary_figure_4.pdf [file vdaa060_suppl_supplementary_figure_4.pdf]

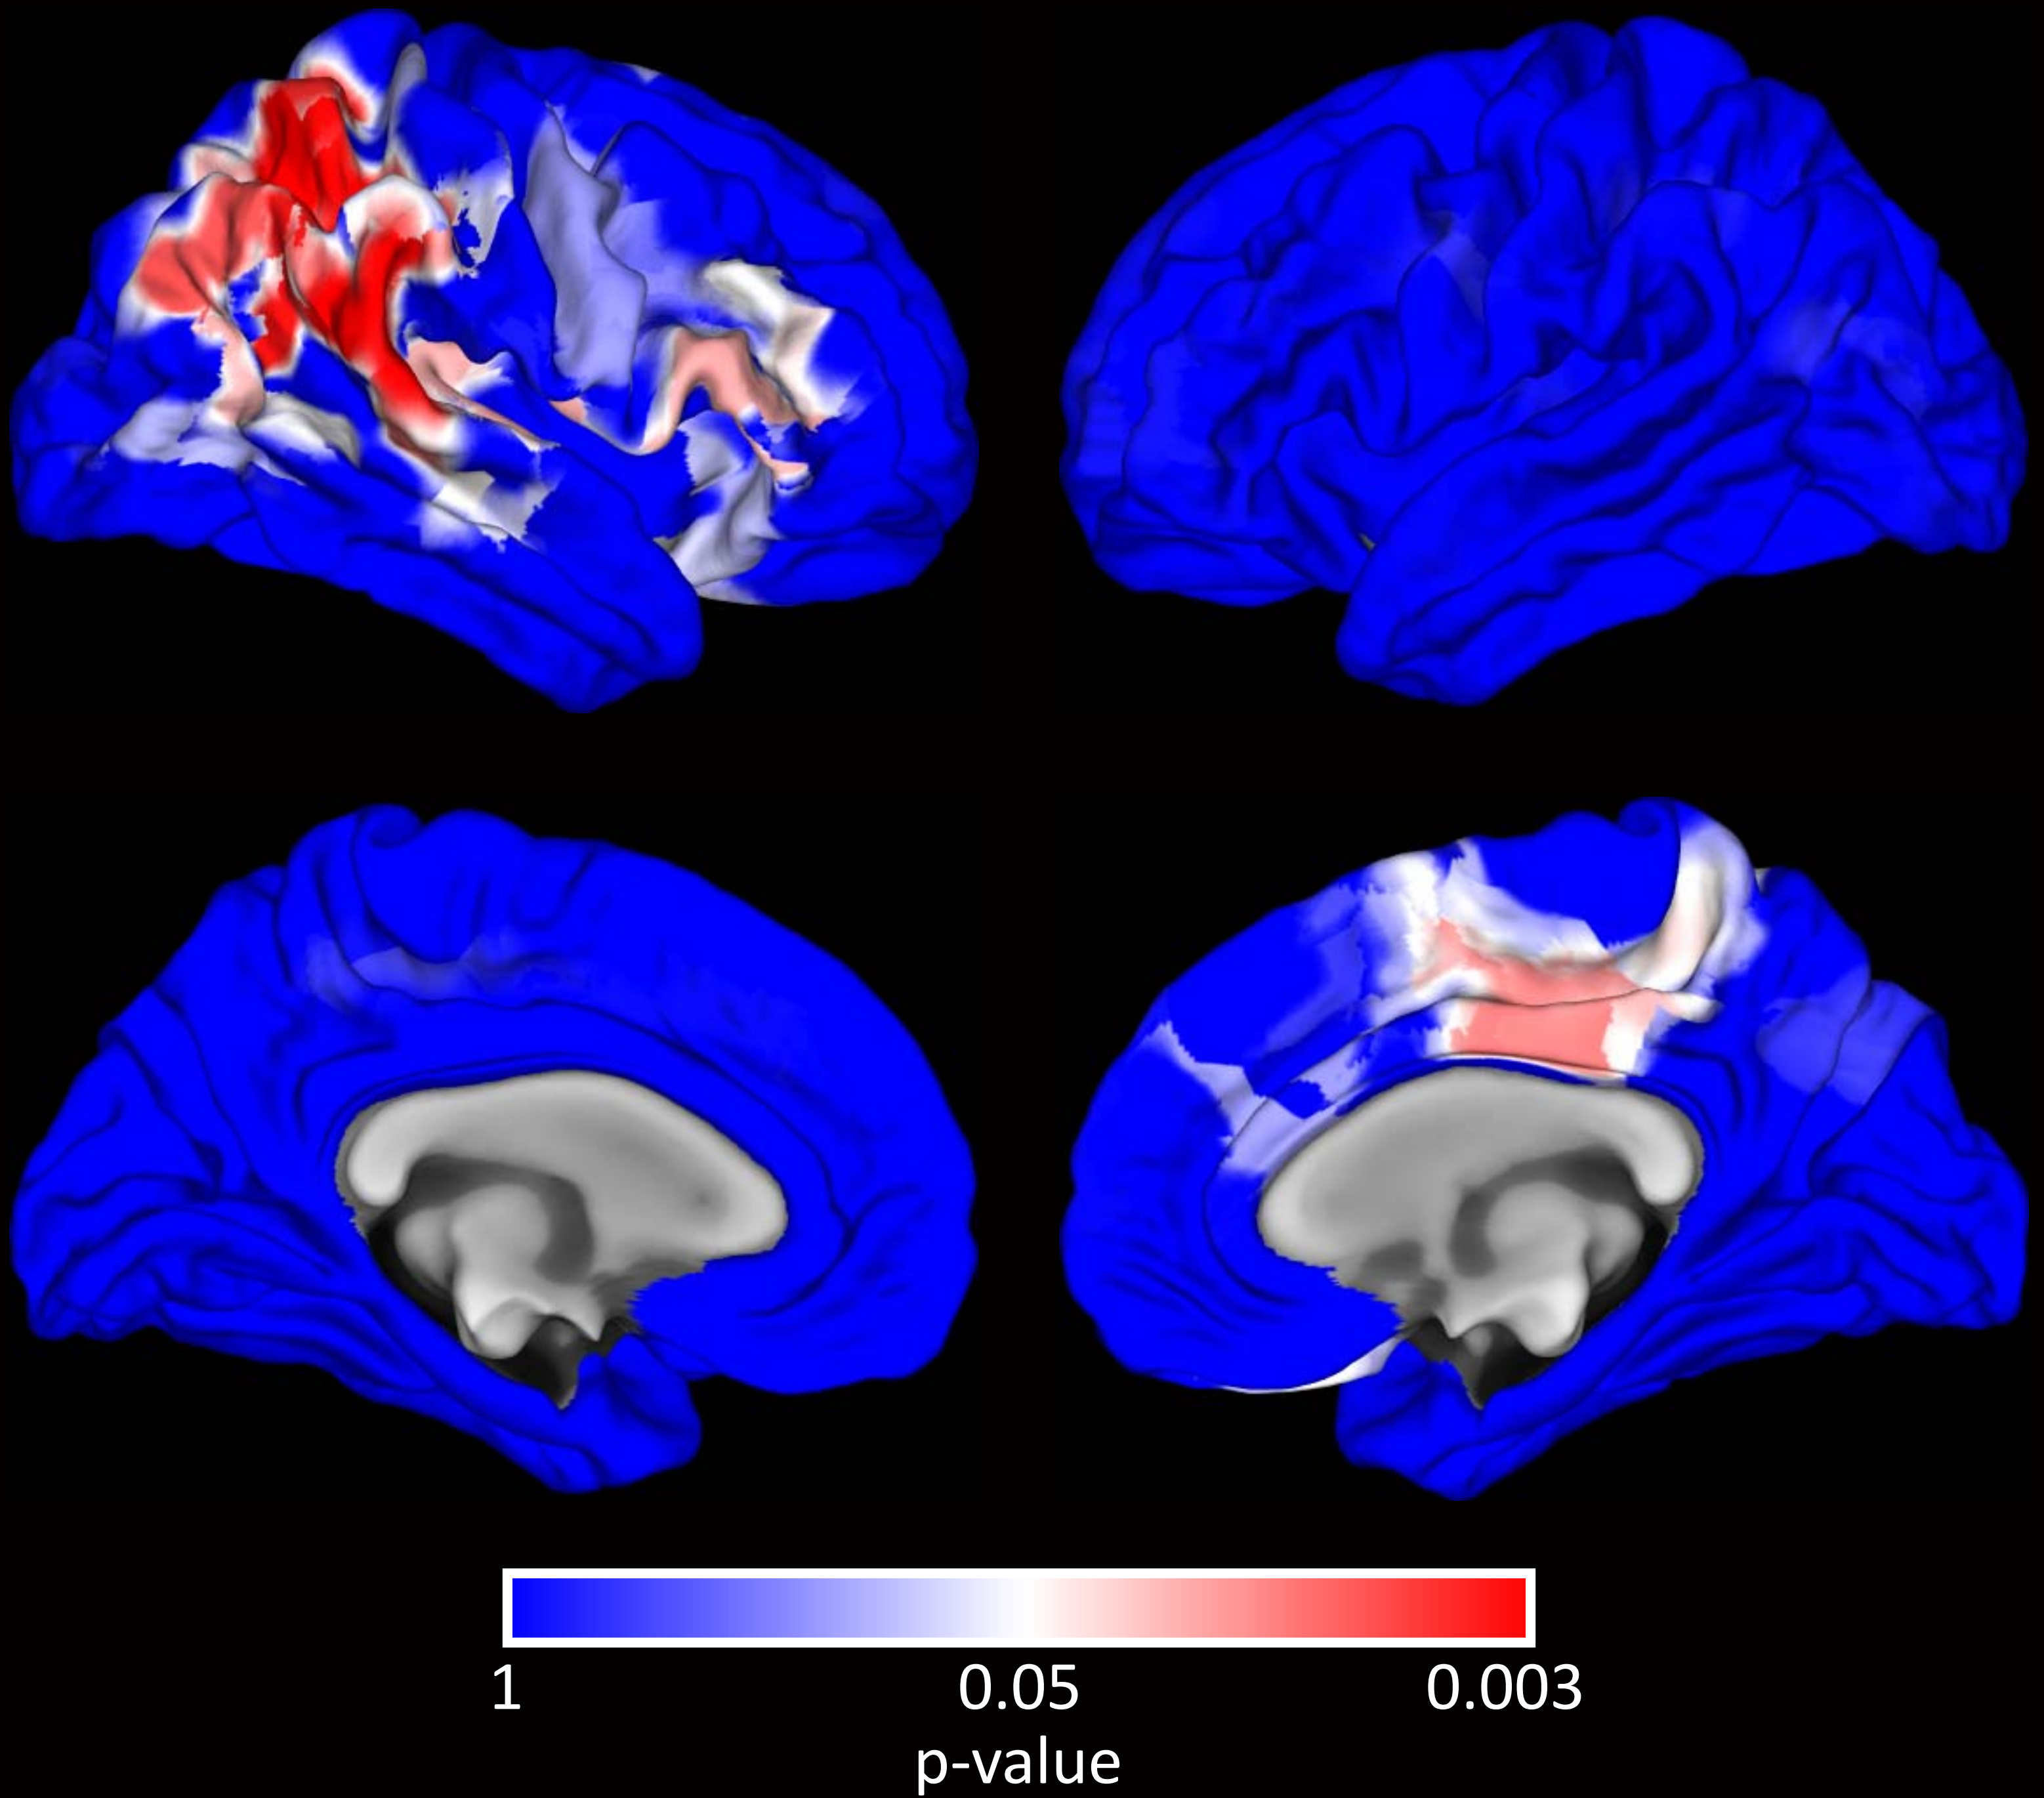

**Supplementary figure 4** Local p-value of relation between dose and cortical thinning
